# Supplementary material for: An improvised one-step sucrose cushion ultracentrifugation method for exosome isolation from culture supernatants of mesenchymal stem cells
Source: PubMed Central journal article supplement (PMC6033286; doi:10.1186/s13287-018-0923-0), 2018-07-04

Fig: S1(a)

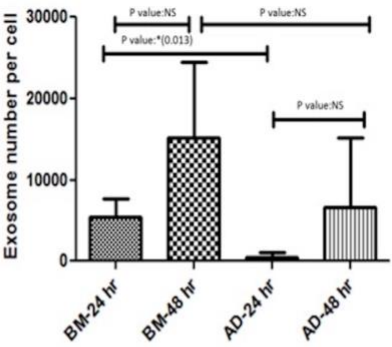

(b)

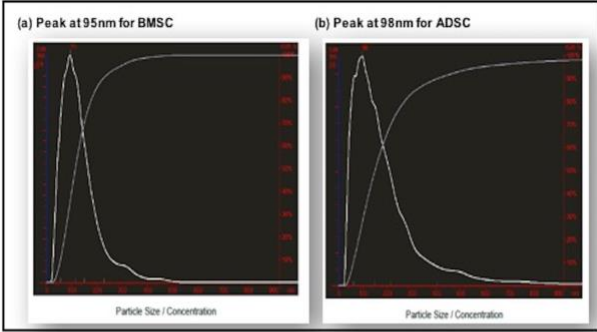

(c)

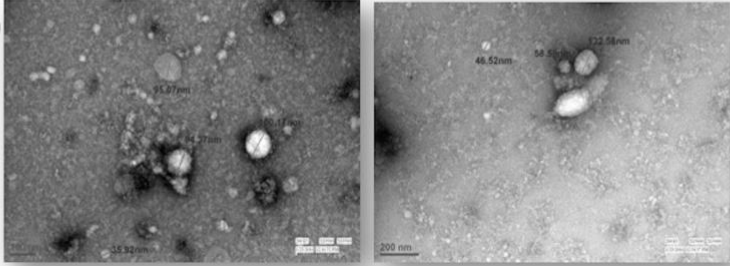

Supplement: 13287_2018_923_MOESM1_ESM.pdf [file 13287_2018_923_MOESM1_ESM.pdf]
